# Supplementary material for: Cancer immunotherapy μ-environment LabChip: taking advantage of optoelectronic tweezers
Source: Royal Society of Chemistry journal article supplement (doi:10.1039/c7lc00963a), 2017-12-06
Supplement: c7lc00963a1.pdf [file c7lc00963a1.pdf]

Supplementary Material (ESI) for Lab on a Chip

## **Cancer Immunotherapy $\mu$ -environment LabChip: Taking Advantage of Optoelectronic Tweezers**

Ling-Yi Ke<sup>a</sup>, Zong-Keng Kuo<sup>b,c</sup>, Yu-Shih Chen<sup>b</sup>, Tsu-Yi Yeh<sup>a</sup>, Minxiang Dong<sup>a</sup>, Hsiang-Wen Tseng<sup>c</sup> and Cheng-Hsien Liu<sup>a,b</sup>

*a. Department of Power Mechanical Engineering, National Tsing Hua University, Hsinchu City 30013, Taiwan, R.O.C.*

*b. Institute of Nanoengineering and Microsystems, National Tsing Hua University, Hsinchu City 30013, Taiwan, R.O.C.*

*c. Pharmacodynamics Technology Department, Center of Excellence for Drug Development, Biomedical Technology and Device Research Labs, Industrial Technology Research Institute, Hsinchu City 30011, Taiwan, R.O.C.*

**Video.** Video S1 shows the demonstration of TiOPc-based OET for precision manipulation of single micro-beads in cancer immunotherapy  $\mu$ -environment LabChip. The operating conditions of our OET are 3 - 5 V<sub>pp</sub> at 10 kHz - 100 kHz. Videos S2 shows the diffusion in time series for PEG-DA hydrogel FLCS microwells in cancer immunotherapy  $\mu$ -environment LabChip.
